# Supplementary material for: Genome-Wide Identification and Characterization of Auxin Response Factor (ARF) Gene Family Involved in Wood Formation and Response to Exogenous Hormone Treatment in Populus trichocarpa
Source: MDPI journal article supplement (doi:10.3390/ijms24010740), 2023-01-01

Motif 1

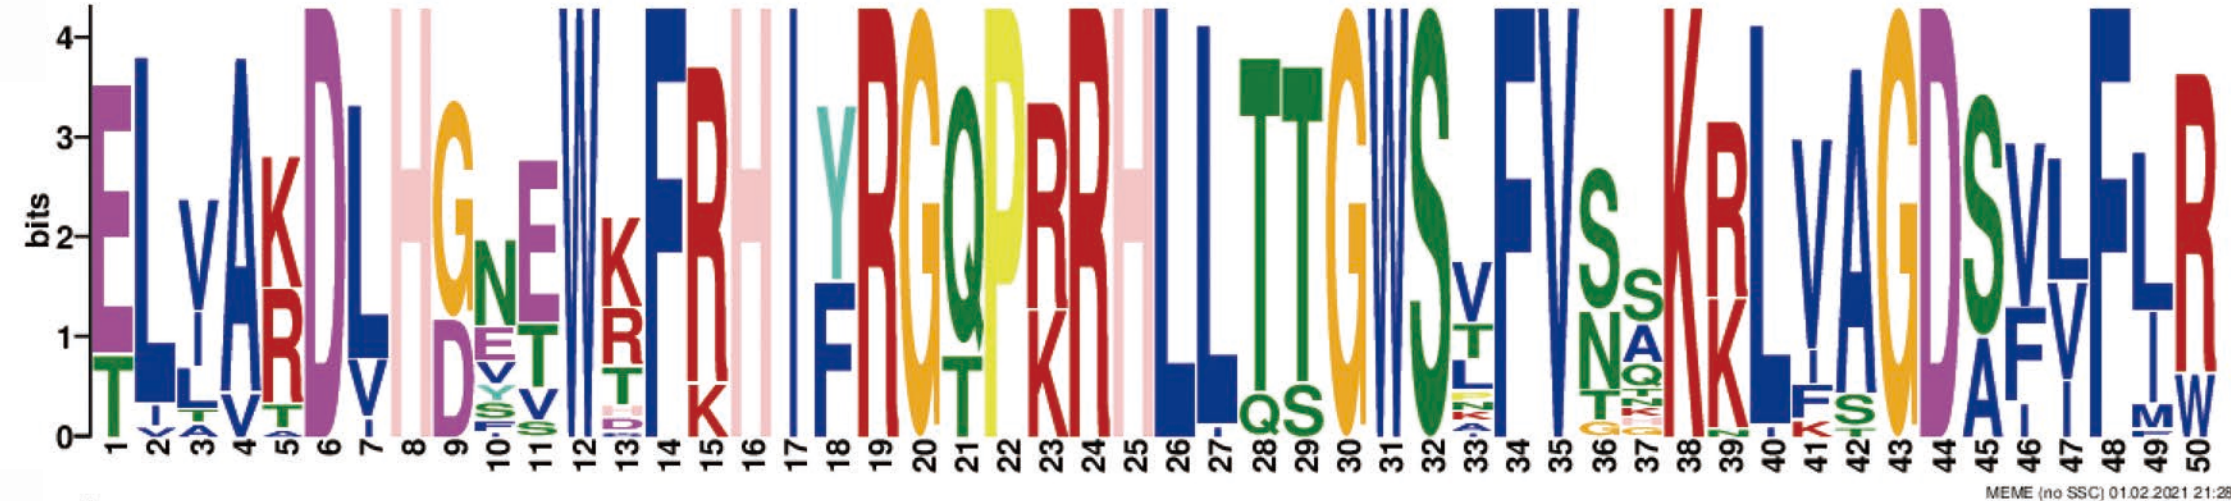

Motif 2

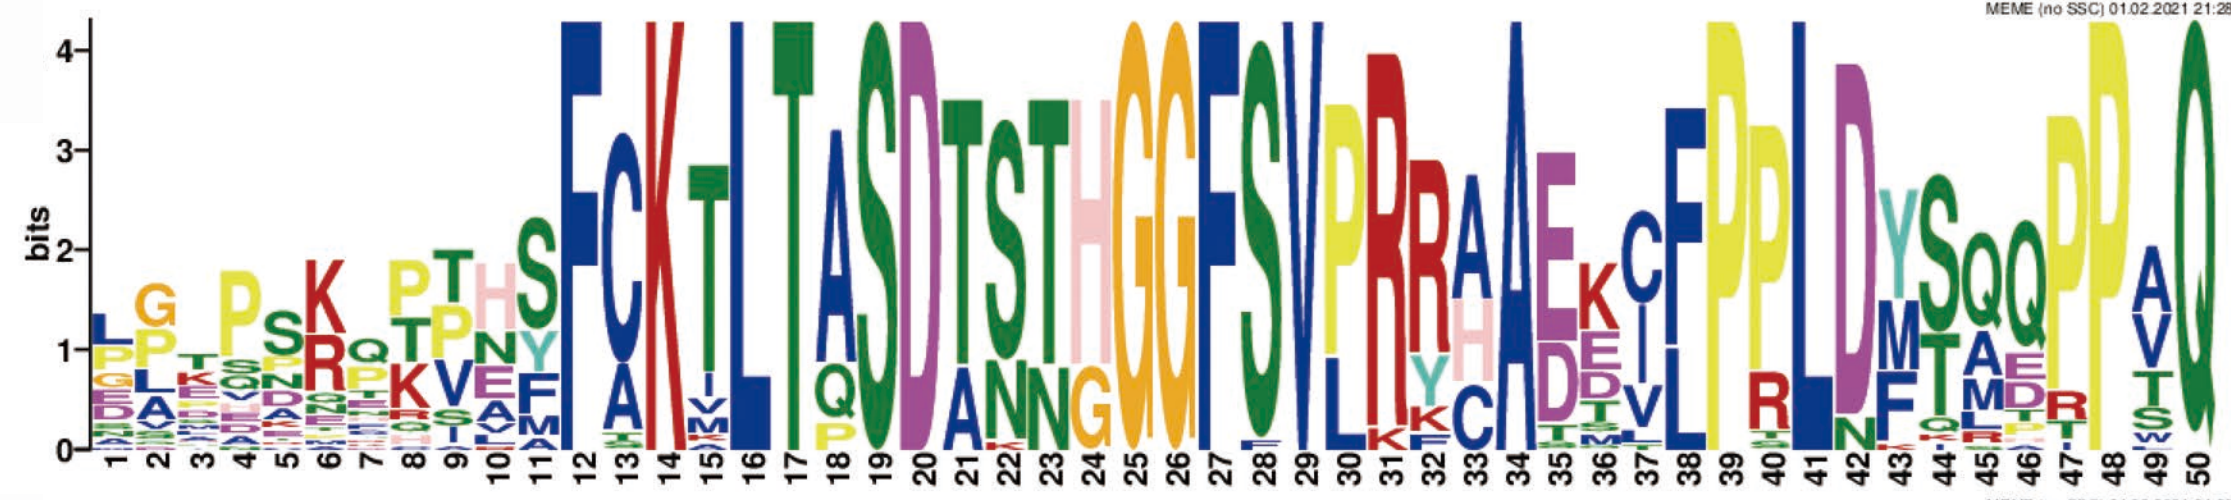

Motif 3

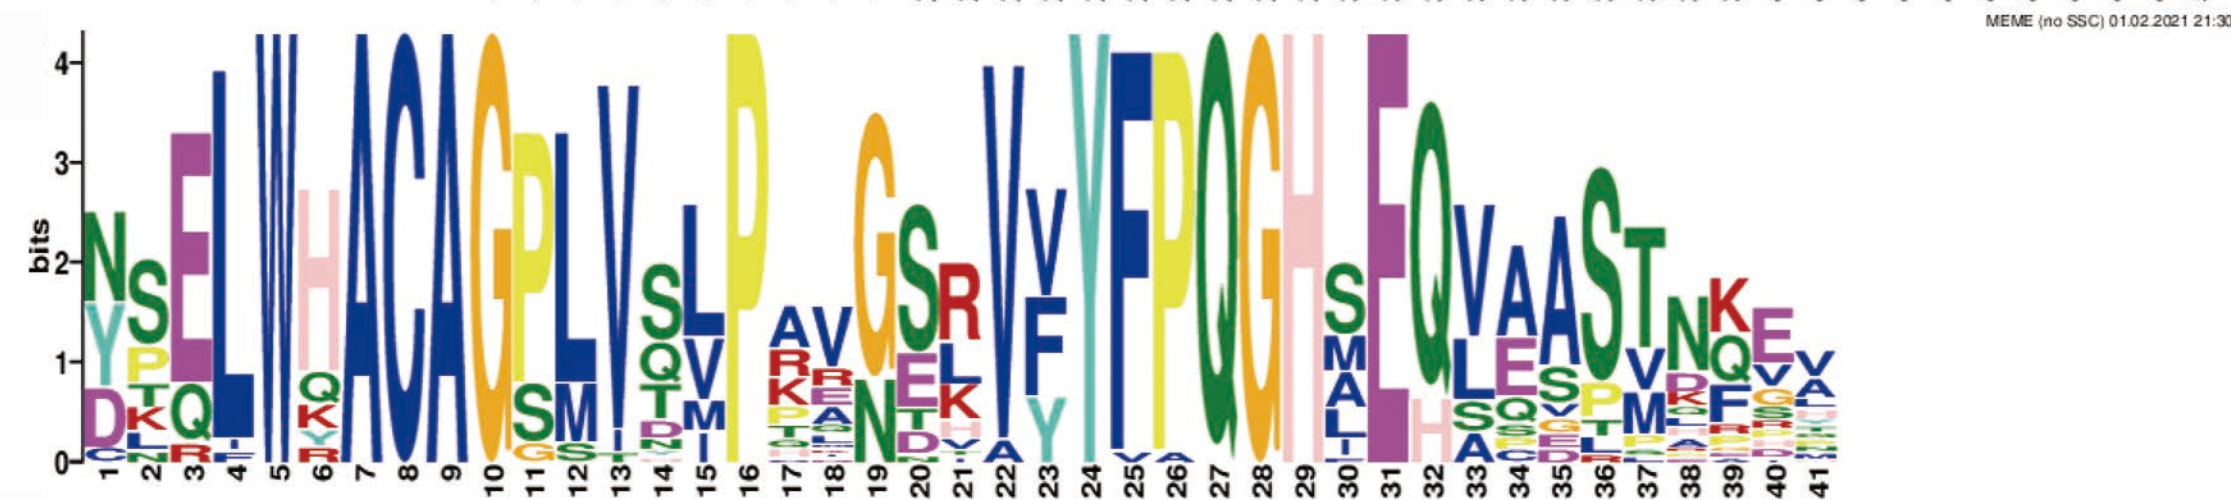

Motif 4

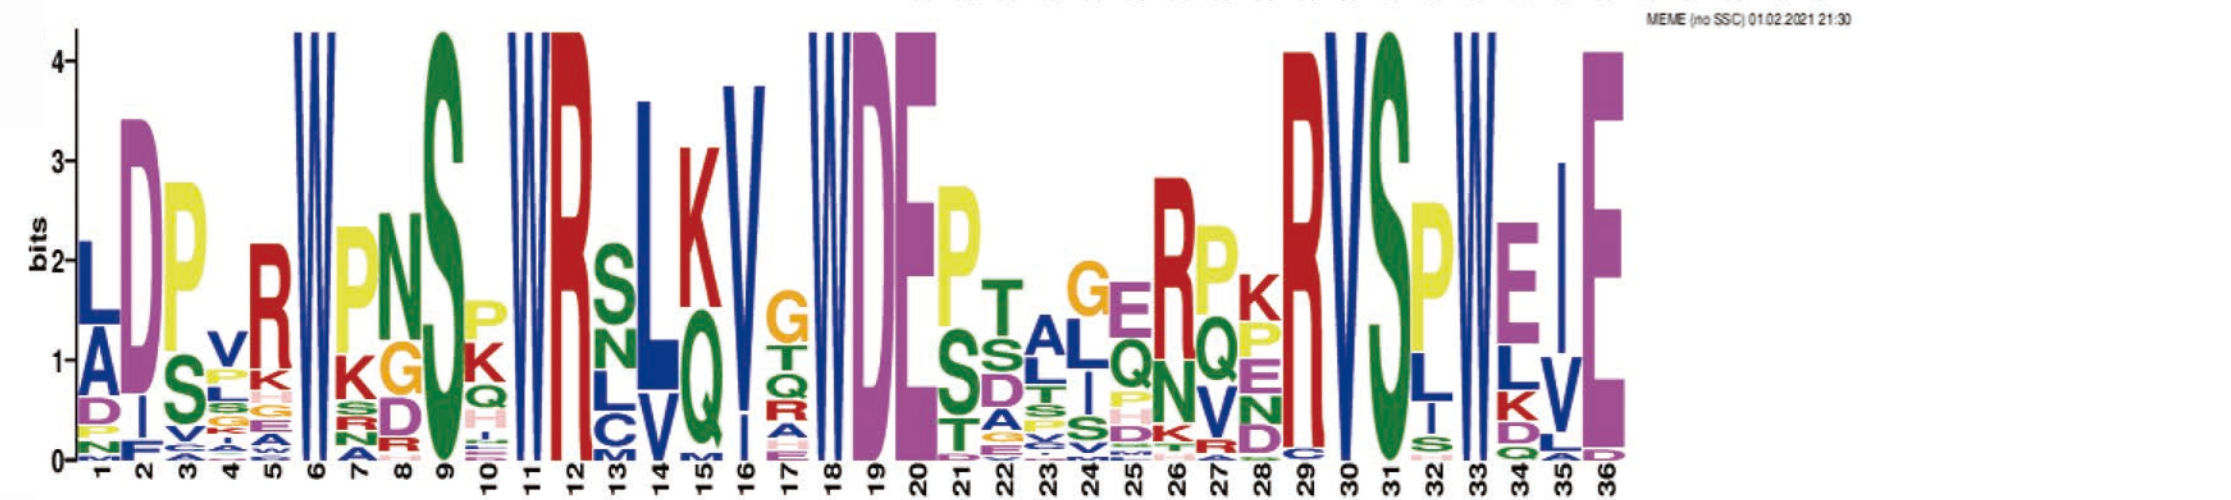

Motif 5

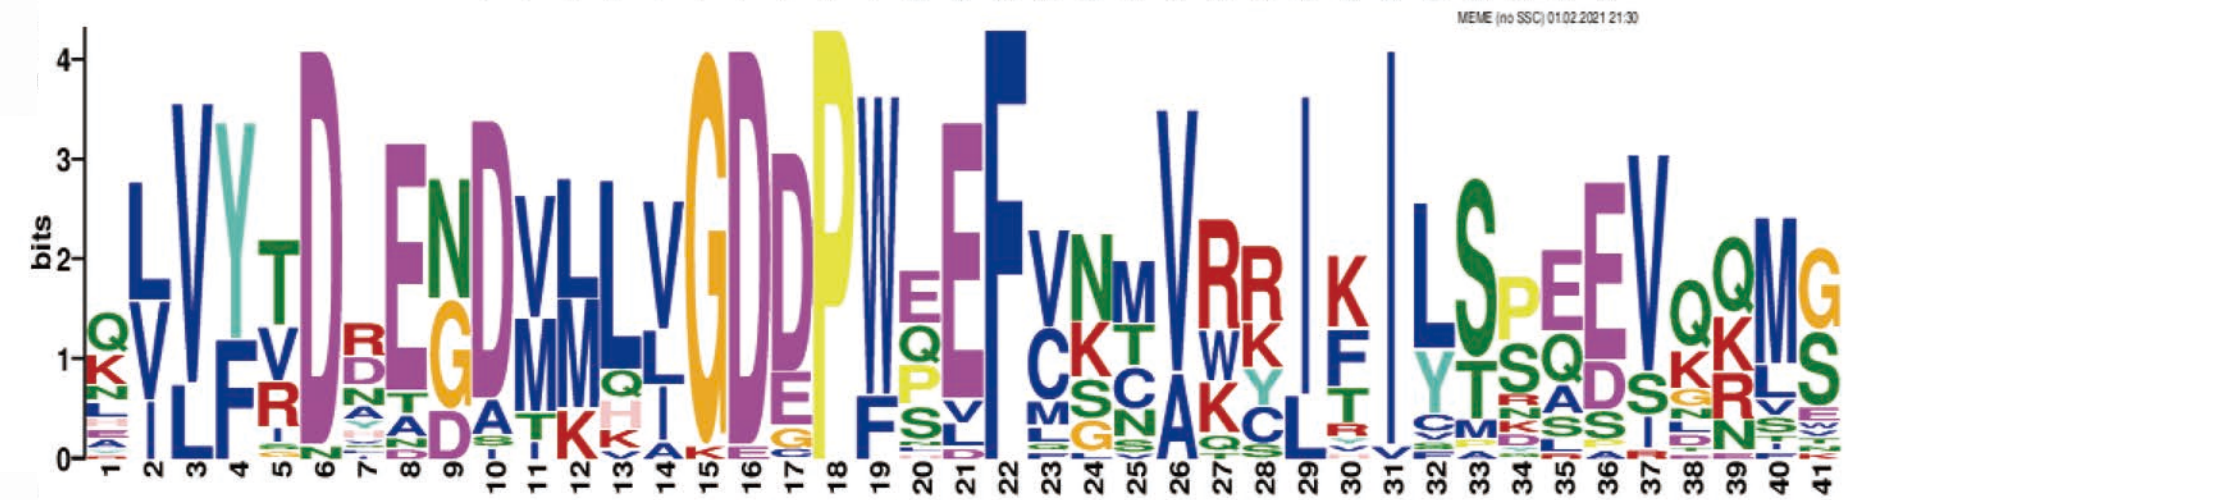

Motif 6

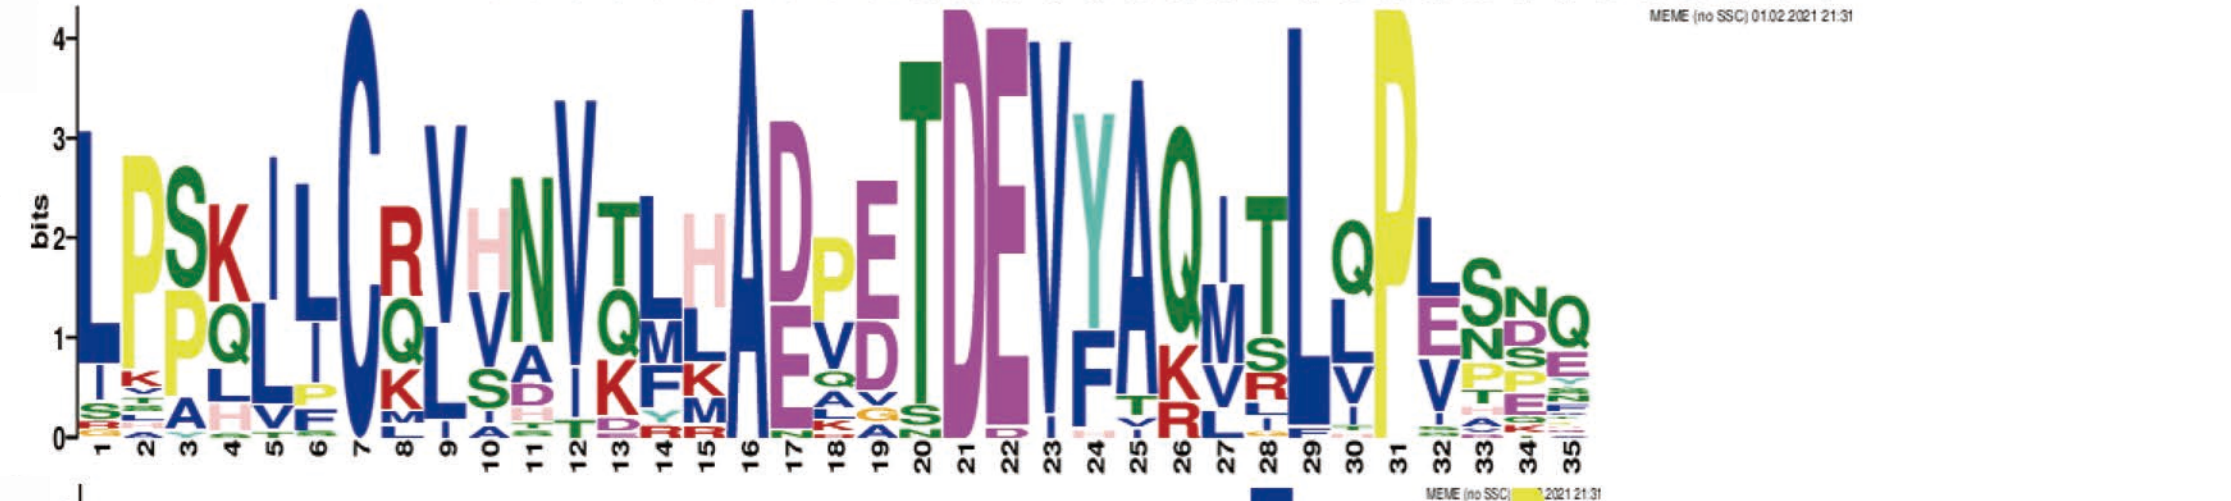

Motif 7

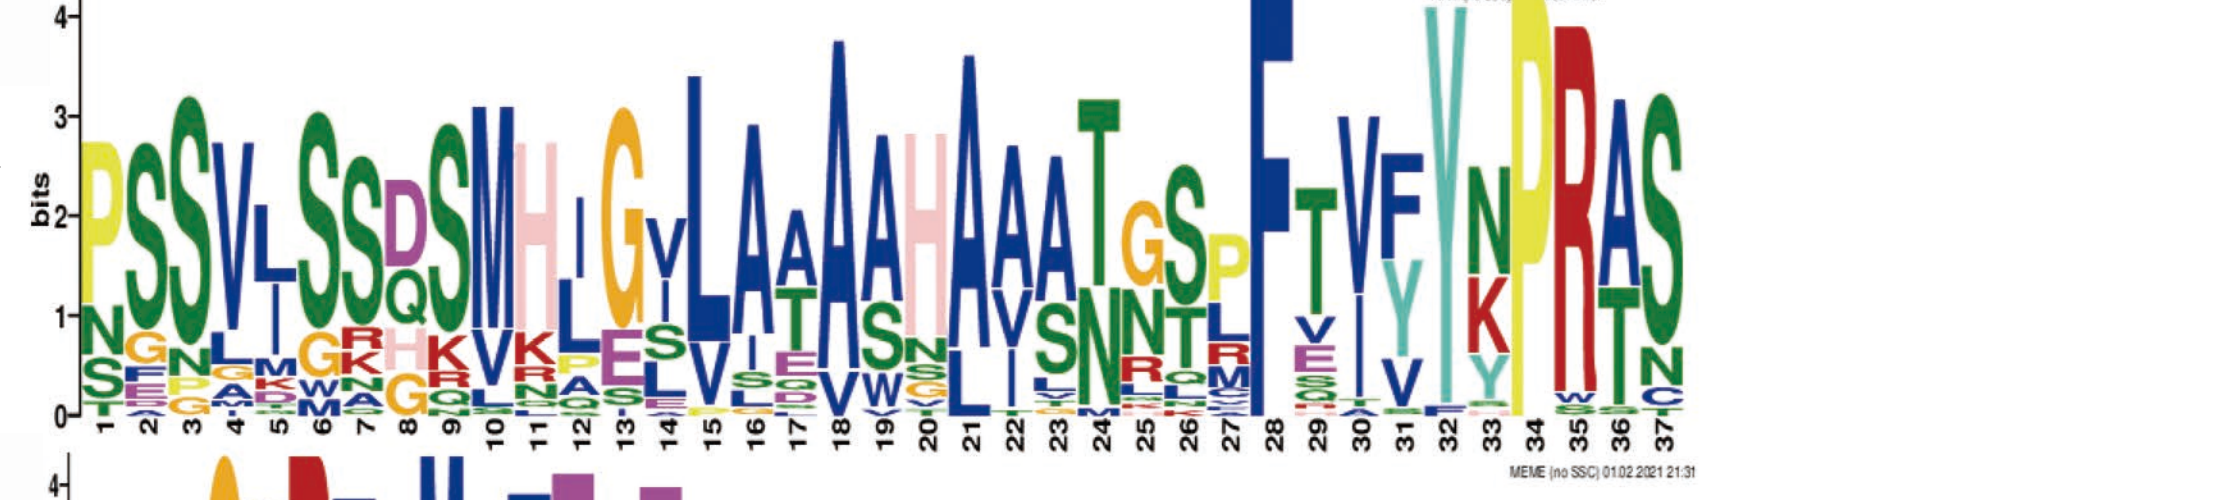

Motif 8

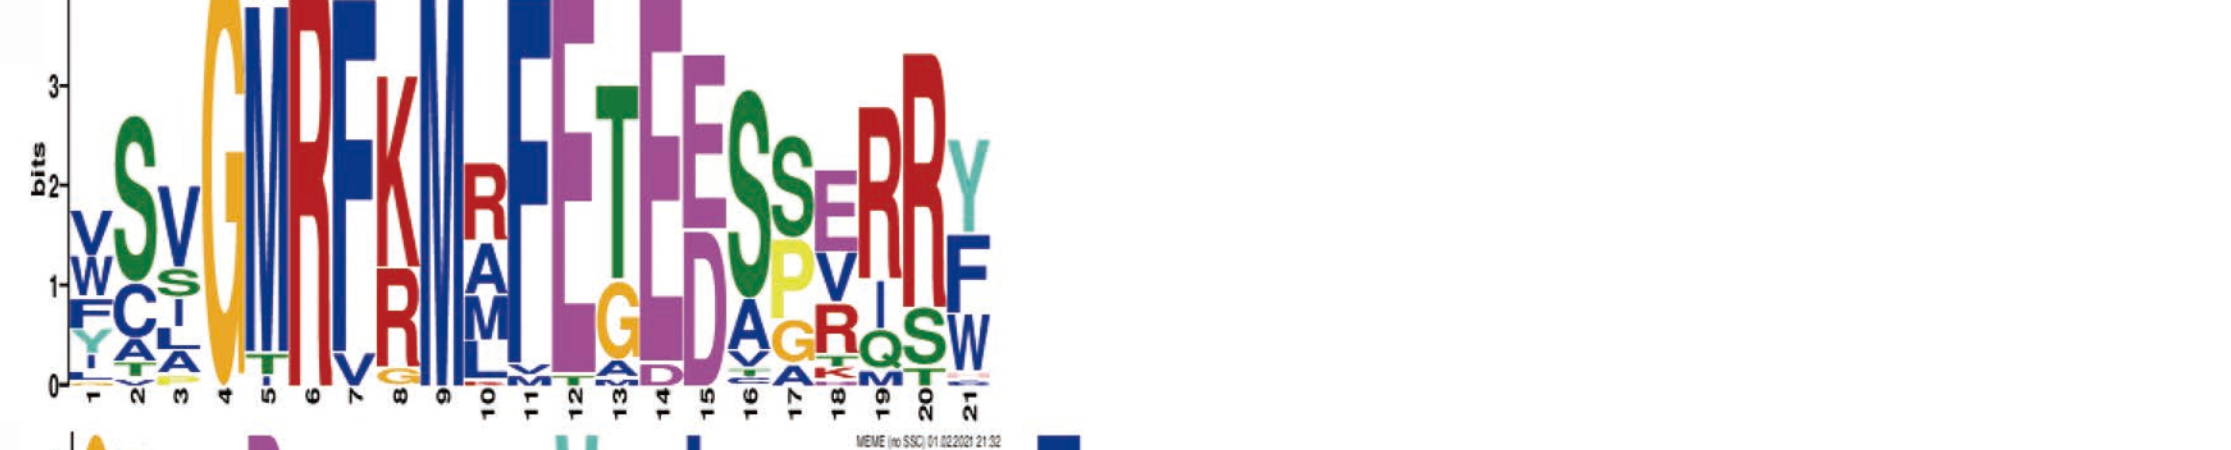

Motif 9

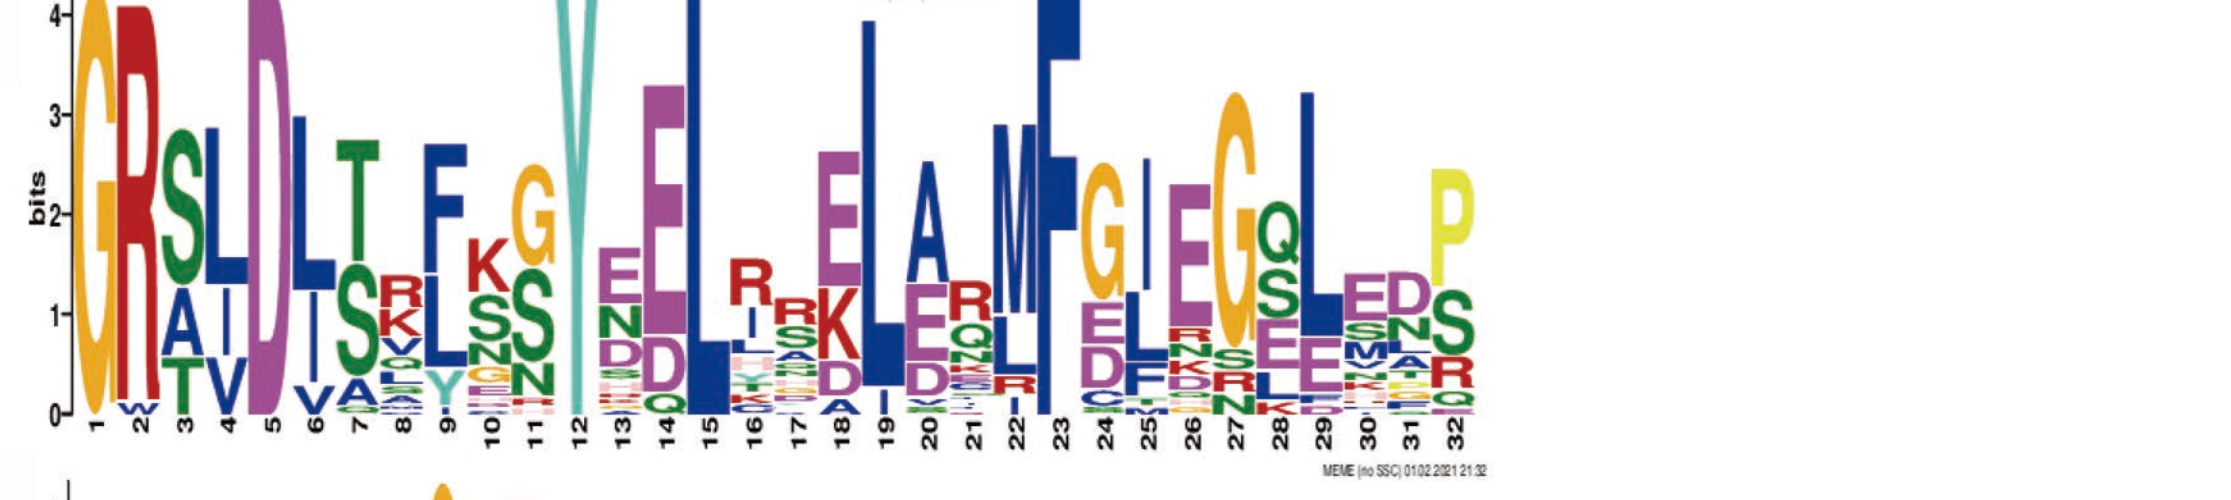

Motif 10

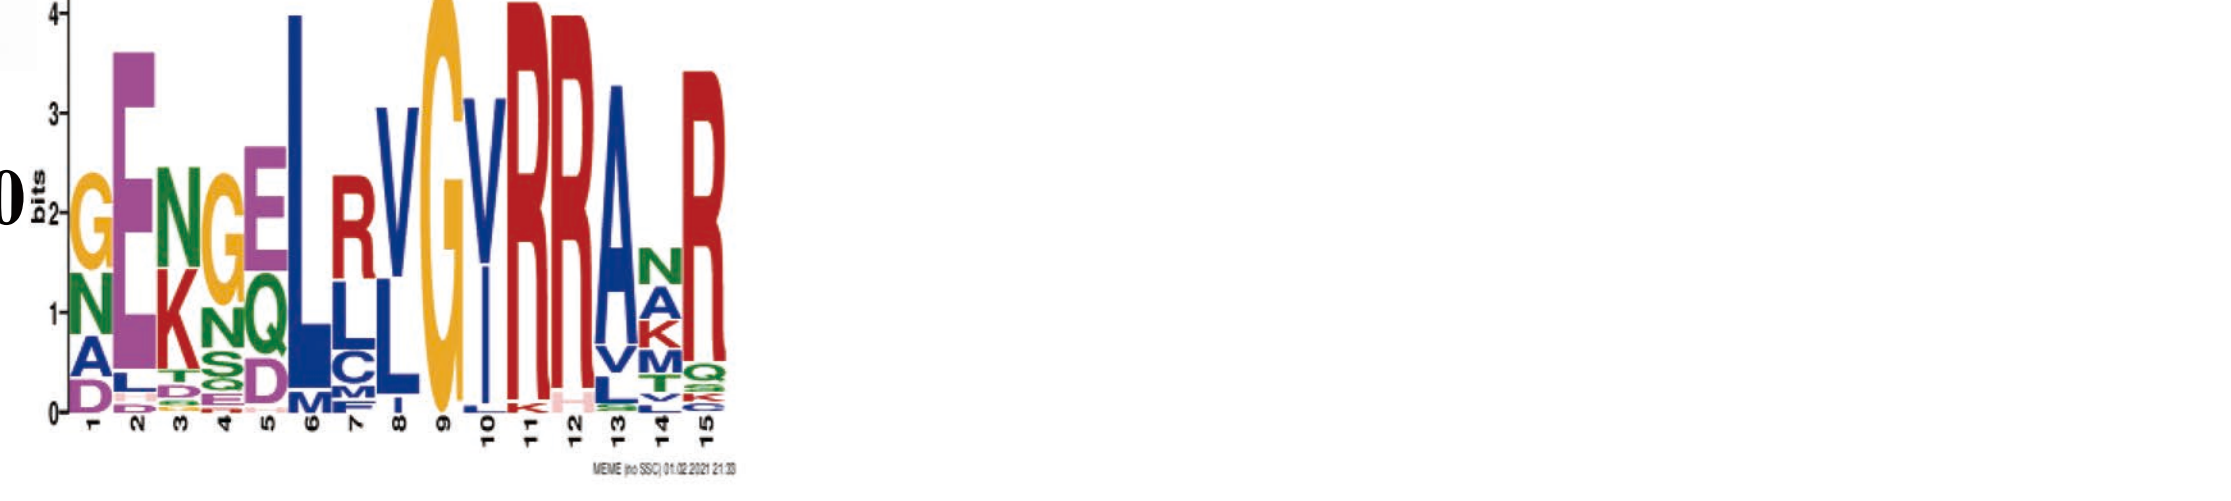



Sequence logo for the 15th position of the 1500 bp DNA sequence. The y-axis represents information content in bits (0 to 4). The x-axis shows the 15 positions. The sequence is 1500 bp long, and the 15th position is highlighted. The logo shows the relative frequency of nucleotides at each position, with 'A' being the most frequent at position 15.

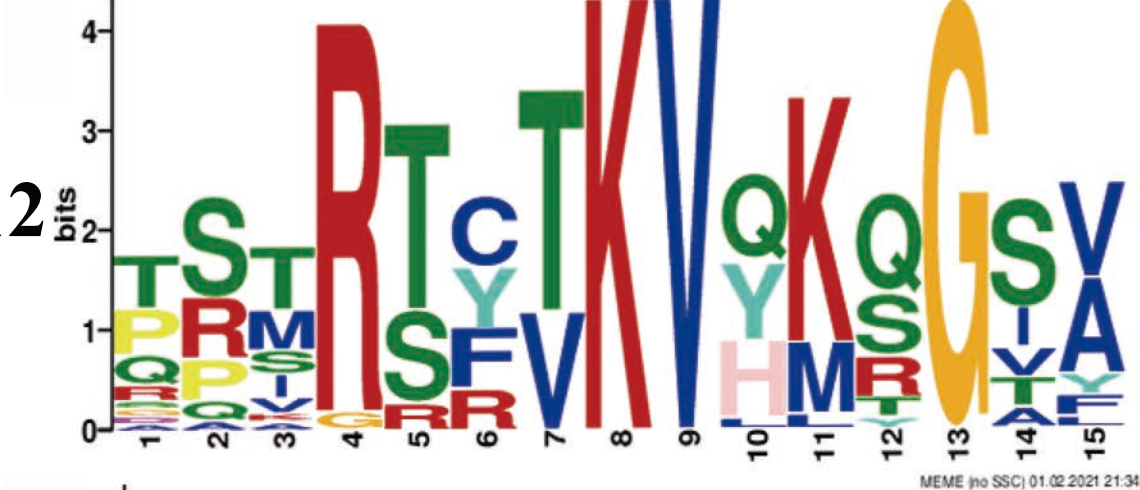

3

bits

1 2 3 4 5 6 7 8 9 10 11 12 13 14 15 16 17 18 19 20 21

MEME (no SSI) 01.02.2021 21\_34

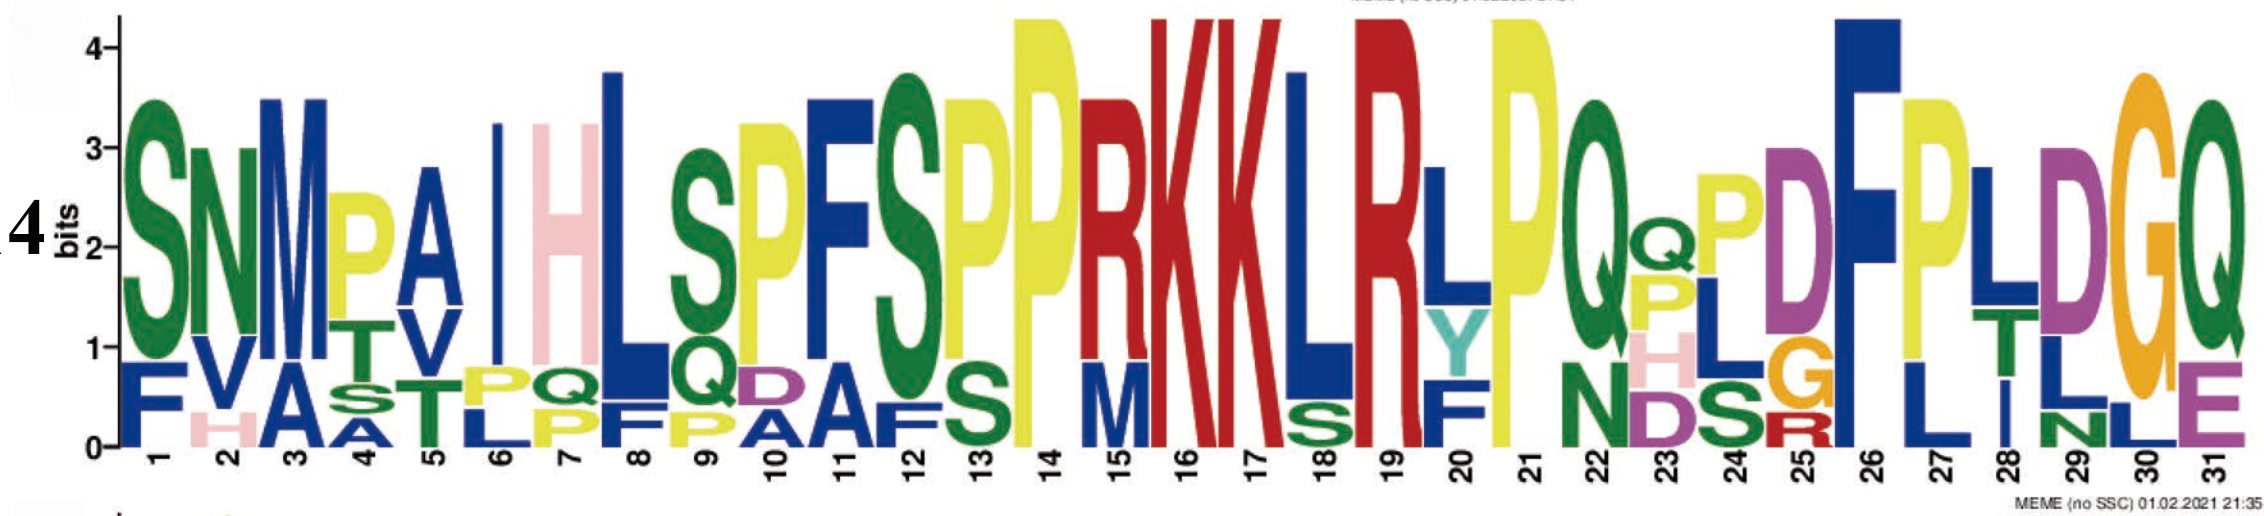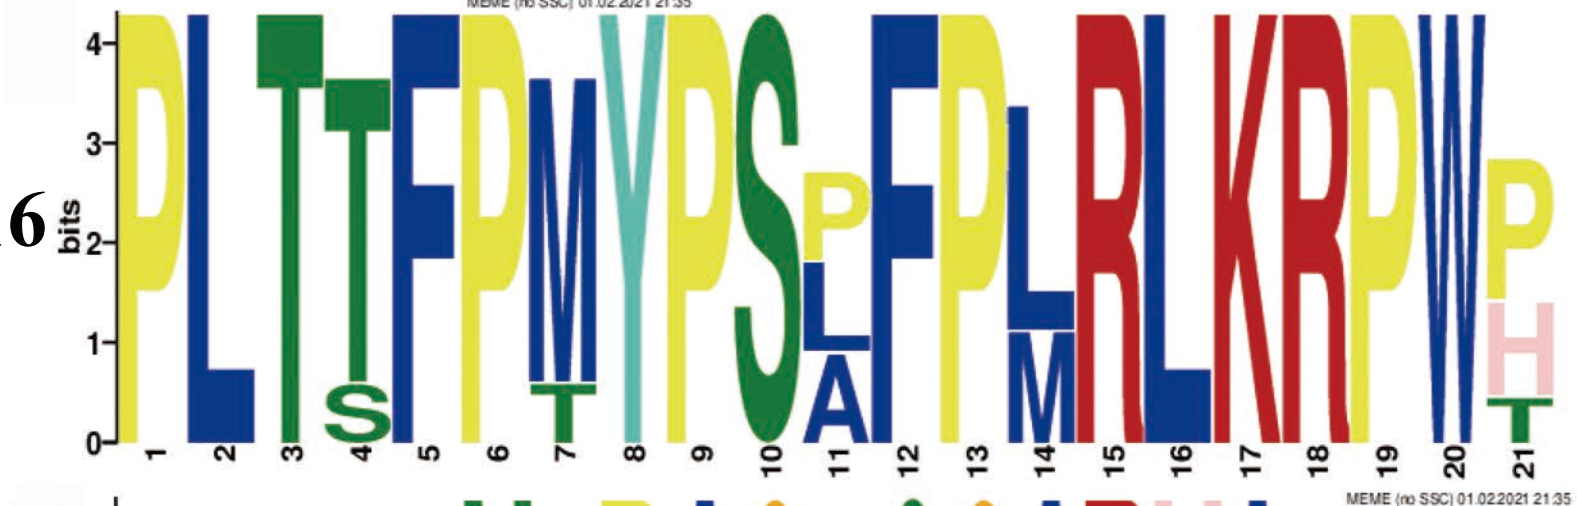

Sequence logo for the 29 amino acids. The y-axis is labeled '7 bits' and ranges from 0 to 4. The x-axis lists amino acids 1 to 29. The logo shows the relative frequency of each amino acid at each position. The sequence is: 1: C, 2: C, 3: L, 4: S, 5: D, 6: N, 7: T, 8: P, 9: A, 10: G, 11: I, 12: Q, 13: G, 14: A, 15: R, 16: H, 17: A, 18: Q, 19: F, 20: G, 21: L, 22: S, 23: L, 24: S, 25: D, 26: T, 27: L, 28: H, 29: F.

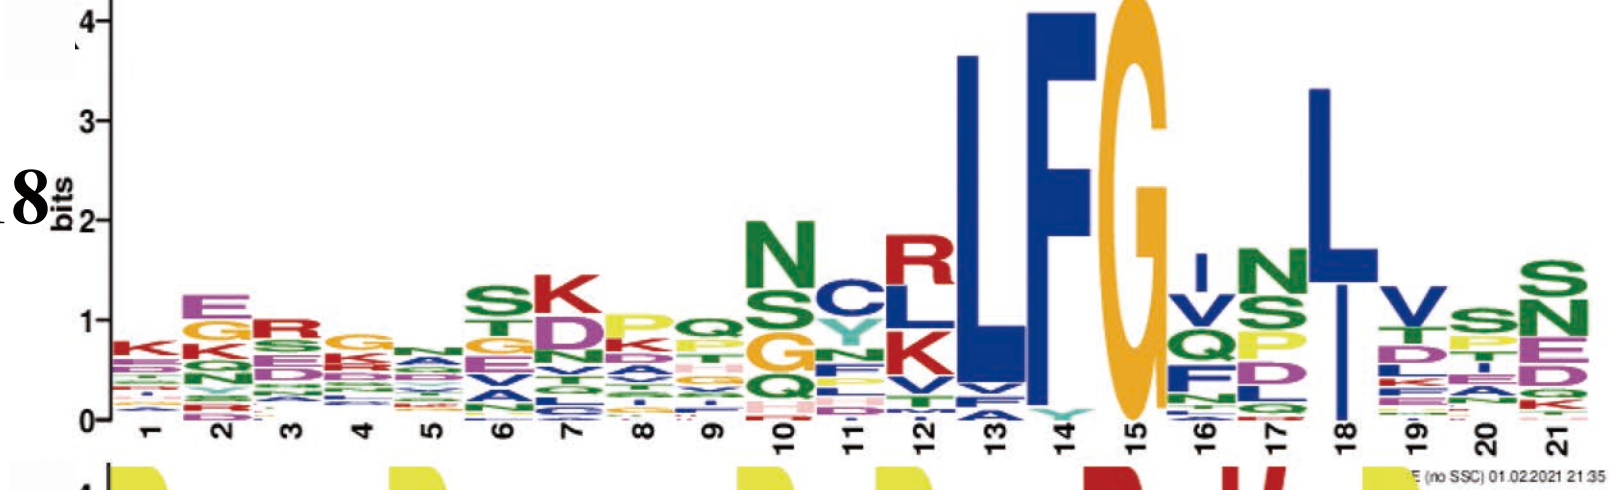

Sequence logo for the 29 amino acids. The y-axis is labeled 'bits' and ranges from 0 to 4. The x-axis is numbered 1 to 29. The logo shows the relative frequency of each amino acid at each position. Position 1 is dominated by P. Positions 2-4 show a mix of V, A, T, and L. Positions 5-12 are dominated by P. Positions 13-14 show F and L. Positions 15-17 show R and K. Positions 18-19 show R and P. Positions 20-23 show R, Q, P, G, M, and V. Positions 24-25 are dominated by P. Positions 26-29 show D, S, and E.

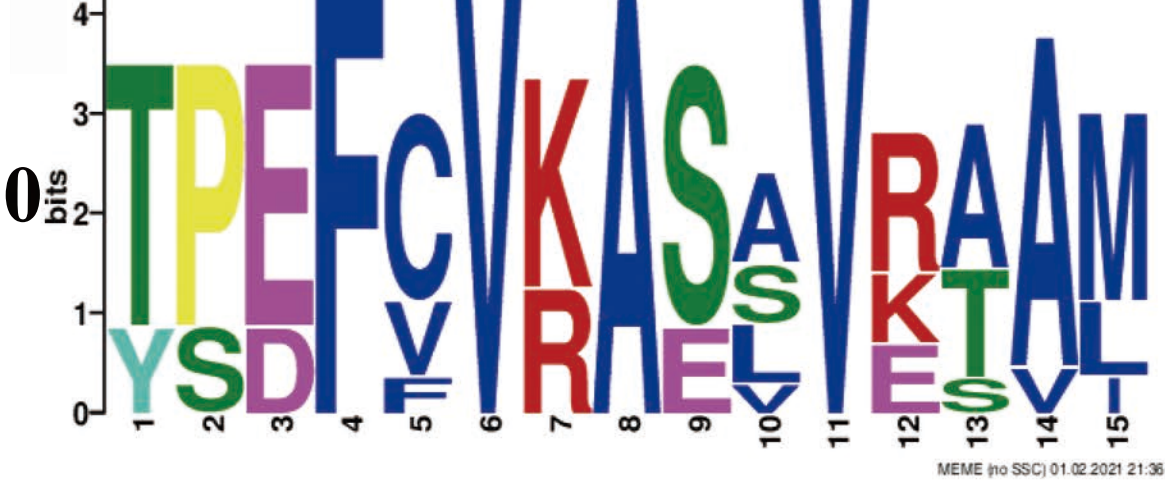

Supplement: s1 [file s1]
