# Supplementary figures and images for: Genome-Wide Identification and Characterization of Auxin Response Factor (ARF) Gene Family Involved in Wood Formation and Response to Exogenous Hormone Treatment in Populus trichocarpa
Source: MDPI journal article supplement (doi:10.3390/ijms24010740), 2023-01-01

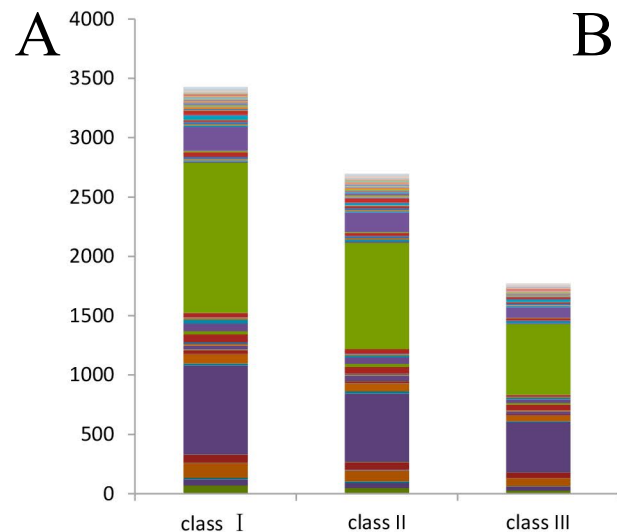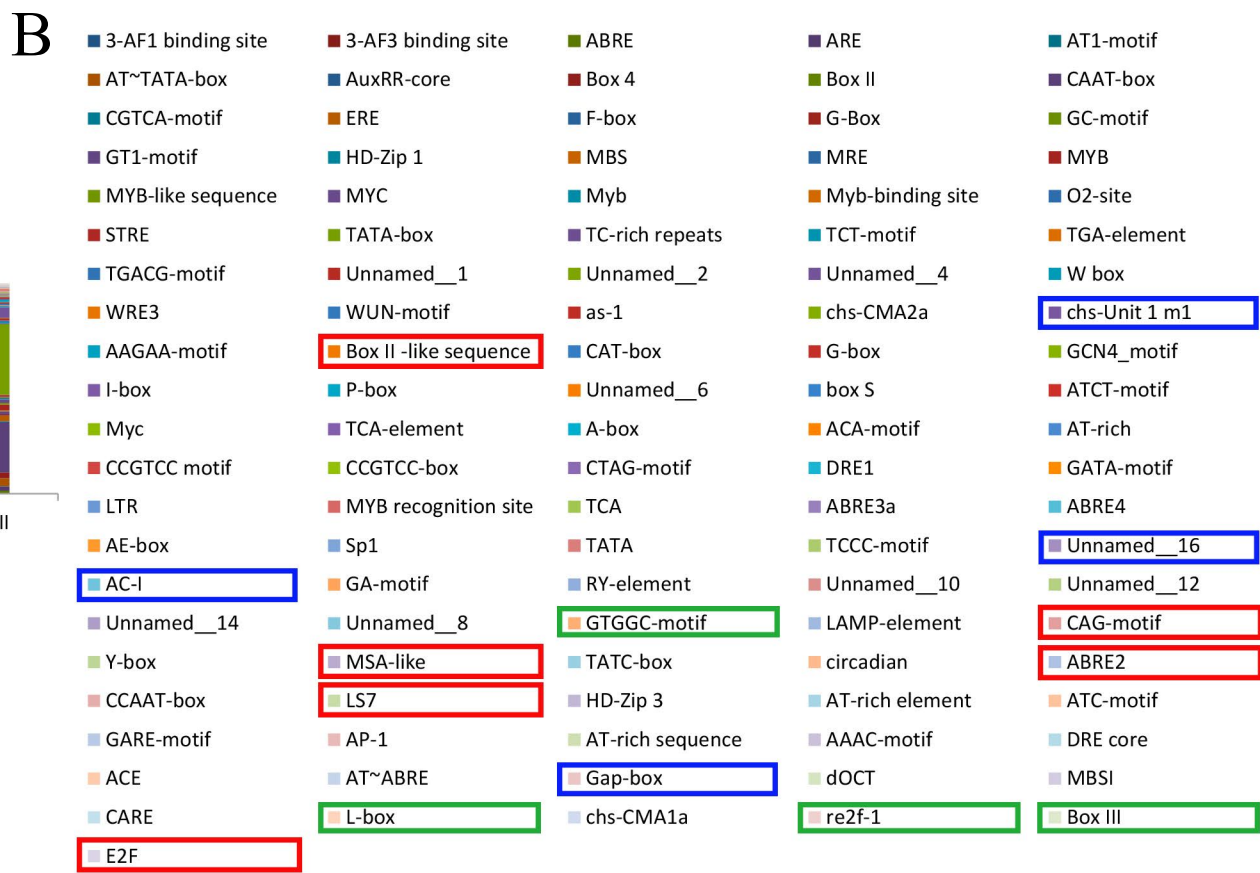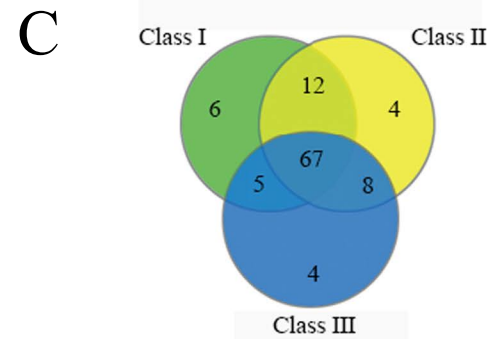

Supplement: s1 [file s1]
